# Supplementary material
Source: Royal Society of Chemistry journal article supplement (doi:10.1039/d5ta10179d)
Supplement: d5ta10179d1.pdf [file d5ta10179d1.pdf]

# Electronic Supplementary Information (ESI)

## Tantalum Oxynitride (TaON): Synthesis Routes, Structural Diversity, and Solar Water Splitting Activity

Mirabbos Hojamberdiev\*, Kostadin Loskoski, and Horst-Günter Rubahn

*Mads Clausen Institute, University of Southern Denmark, Alsion 2, 6400 Sønderborg, Denmark*

*This work is dedicated to Professor Martin Lerch on the occasion of his 64<sup>th</sup> birthday.*

\*Corresponding author: [mirabbos@mci.sdu.dk](mailto:mirabbos@mci.sdu.dk) (M. Hojamberdiev)

**Table S1. Photocatalytic performance of TaON**

| HEP (co-catalyst)                                                                   | OEP (co-catalyst)                 | Photocatalytic half-reaction (WS)                                                                                                                                                                                                                    |                                                                                                                                                                                                                     | Overall reaction (WS)                                                                                                                                                                                                                                                                             |                                                                                                                                                                                                    | Reference | Year |
|-------------------------------------------------------------------------------------|-----------------------------------|------------------------------------------------------------------------------------------------------------------------------------------------------------------------------------------------------------------------------------------------------|---------------------------------------------------------------------------------------------------------------------------------------------------------------------------------------------------------------------|---------------------------------------------------------------------------------------------------------------------------------------------------------------------------------------------------------------------------------------------------------------------------------------------------|----------------------------------------------------------------------------------------------------------------------------------------------------------------------------------------------------|-----------|------|
|                                                                                     |                                   | Reaction conditions                                                                                                                                                                                                                                  | Activity                                                                                                                                                                                                            | Reaction conditions                                                                                                                                                                                                                                                                               | Activity                                                                                                                                                                                           |           |      |
| TaON (3 wt% Pt)                                                                     | TaON (Ag <sup>0</sup> )           | 10 vol.% methanol solution for H <sub>2</sub> evolution; 10 mM AgNO <sub>3</sub> aqueous solution and 200 mg La <sub>2</sub> O <sub>3</sub> for O <sub>2</sub> evolution; under visible light (300 W Xe lamp), 400 mg of HEP and 400 mg of OEP       | AQE = 0.2% in H <sub>2</sub> evolution; AQE = 34%, and rate 1650 μmol·g <sup>-1</sup> ·h <sup>-1</sup> in evolution of O <sub>2</sub>                                                                               | -                                                                                                                                                                                                                                                                                                 | -                                                                                                                                                                                                  | 46        | 2002 |
| TaON (0.05 wt% Ru)                                                                  | -                                 | 80 vol.% methanol solution for H <sub>2</sub> evolution, under visible light (300 W Xe lamp), 400 mg of HEP                                                                                                                                          | AQE = 0.8%, and 300 μmol·g <sup>-1</sup> ·h <sup>-1</sup> H <sub>2</sub> evolution rate in aqueous methanol solution and AQE = 2.1% in aqueous ethanol solution.                                                    | -                                                                                                                                                                                                                                                                                                 | -                                                                                                                                                                                                  | 86        | 2003 |
| TaON (3 wt.% Pt)                                                                    | TaON                              | 20 vol.% methanol solution for H <sub>2</sub> ; 20 mM of AgNO <sub>3</sub> aqueous solution and 200 mg La <sub>2</sub> O <sub>3</sub> for O <sub>2</sub> evolution; under visible light (300 W Xe lamp), 400 mg of HEP and 400 mg of OEP             | Initial AQE 0.1% at 420-500 nm of H <sub>2</sub> ; initial evolution rate 500 μmol·g <sup>-1</sup> ·h <sup>-1</sup> of O <sub>2</sub> with AQE = 10%                                                                | -                                                                                                                                                                                                                                                                                                 | -                                                                                                                                                                                                  | 89        | 2003 |
| TaON (0.05 wt.% Ru)                                                                 | -                                 | 80 vol.% methanol solution and 80 vol.% ethanol solution for H <sub>2</sub> evolution, under visible light (300 W Xe lamp), 400 mg of HEP                                                                                                            | AQE 0.8% and H <sub>2</sub> evolution rate 300 μmol·g <sup>-1</sup> ·h <sup>-1</sup> in aqueous methanol, AQE 2.1% and H <sub>2</sub> evolution rate ~550 μmol·g <sup>-1</sup> ·h <sup>-1</sup> in aqueous ethanol. | -                                                                                                                                                                                                                                                                                                 | -                                                                                                                                                                                                  | 87        | 2004 |
| TaON (0.3 wt% Pt)                                                                   | WO <sub>3</sub> (0.5 wt% Pt)      | 5 mM NaI of aqueous solution for H <sub>2</sub> under visible light (300 W Xe lamp), 200 mg of HEP                                                                                                                                                   | 5 μmol·g <sup>-1</sup> ·h <sup>-1</sup> H <sub>2</sub>                                                                                                                                                              | 5 mM NaI aqueous solution; under visible light (300 W Xe lamp), 200 mg of HEP and 200 mg of OEP                                                                                                                                                                                                   | AQE = 0.4% at 420 nm                                                                                                                                                                               | 201       | 2005 |
| -                                                                                   | TaON                              | 2 mM FeCl <sub>3</sub> of aqueous solution for O <sub>2</sub> evolution; under visible light (300 W Xe lamp); 200 mg of OEP                                                                                                                          | ~10 μmol·g <sup>-1</sup> ·h <sup>-1</sup> O <sub>2</sub>                                                                                                                                                            | -                                                                                                                                                                                                                                                                                                 | -                                                                                                                                                                                                  | 100       | 2005 |
| TaON (3 wt% Pt)                                                                     | TaON                              | 10 vol.% methanol solution for H <sub>2</sub> evolution; 10 mM AgNO <sub>3</sub> aqueous solution and 200 mg La <sub>2</sub> O <sub>3</sub> for O <sub>2</sub> evolution; 400 mg catalyst                                                            | 12.5 μmol·g <sup>-1</sup> ·h <sup>-1</sup> H <sub>2</sub> evolution; 225 μmol·g <sup>-1</sup> ·h <sup>-1</sup> O <sub>2</sub> evolution                                                                             | -                                                                                                                                                                                                                                                                                                 | -                                                                                                                                                                                                  | 19        | 2007 |
| m-ZrO <sub>2</sub> /TaON (0.05 wt% Ru)                                              | WO <sub>3</sub> (0.5 wt% Pt)      | 80 vol.% methanol solution for H <sub>2</sub> evolution; 10 mM AgNO <sub>3</sub> aqueous solution and 200 mg La <sub>2</sub> O <sub>3</sub> for O <sub>2</sub> evolution; 400 mg of HEP and 400 mg of OEP                                            | ~12 μmol·g <sup>-1</sup> ·h <sup>-1</sup> H <sub>2</sub> evolution rate                                                                                                                                             | 1 mM NaI aqueous solution, under visible light (300 W Xe lamp); 200 mg of HEP and 200 mg of OEP                                                                                                                                                                                                   | ~20 μmol·g <sup>-1</sup> ·h <sup>-1</sup> H <sub>2</sub> ; ~10 μmol·g <sup>-1</sup> ·h <sup>-1</sup> O <sub>2</sub>                                                                                | 202       | 2008 |
| TaON (0.3 wt% Pt)                                                                   | TaON (0.3 wt% RuO <sub>2</sub> )  | 1 mM NaI aqueous solution for H <sub>2</sub> evolution; 1 mM NaIO <sub>3</sub> aqueous solution for O <sub>2</sub> evolution; under visible light (300 W Xe lamp), 50 mg of HEP and 50 mg of OEP                                                     | 66 μmol·g <sup>-1</sup> ·h <sup>-1</sup> H <sub>2</sub> ; 460 μmol·g <sup>-1</sup> ·h <sup>-1</sup> O <sub>2</sub>                                                                                                  | 1 mM NaI aqueous solution; aqueous solution for O <sub>2</sub> evolution; 50 mg of HEP and 50 mg of OEP                                                                                                                                                                                           | AQE = 0.1-0.2% at λ>420 nm                                                                                                                                                                         | 91        | 2008 |
| Zr <sub>1-x</sub> Ta <sub>1-x</sub> O <sub>1+x</sub> N <sub>1-x</sub> (0.05 wt% Ru) | -                                 | 80 vol.% methanol solution, under visible light (300 W Xe lamp), 400 mg of HEP                                                                                                                                                                       | ~250 μmol·g <sup>-1</sup> ·h <sup>-1</sup> H <sub>2</sub>                                                                                                                                                           | -                                                                                                                                                                                                                                                                                                 | -                                                                                                                                                                                                  | 122       | 2009 |
| ZrO <sub>2</sub> /TaON (1.0 wt% Pt)                                                 | WO <sub>3</sub> (0.5 wt% Pt)      | For H <sub>2</sub> evolution half-reaction: Pt/ZrO <sub>2</sub> /TaON (50 mg) in 100 mL aqueous NaI solution (1.0 mM); For O <sub>2</sub> evolution half-reaction: Pt/WO <sub>3</sub> (100 mg) in 100 mL aqueous NaIO <sub>3</sub> solution (1.0 mM) | H <sub>2</sub> evolution 29.6 μmol·g <sup>-1</sup> ·h <sup>-1</sup>                                                                                                                                                 | Z-scheme system: Pt/ZrO <sub>2</sub> /TaON (50 mg) + Pt/WO <sub>3</sub> (100 mg) in 100 mL aqueous NaI solution (1.0 mM) as redox mediator (IO <sub>3</sub> <sup>-</sup> /I <sup>-</sup> shuttle). Xenon lamp (300 W) with cold mirror and L42 cutoff filter for visible light (420 < λ < 800 nm) | At optimal NaI concentration (1.0 mM) and pH = 5.4; H <sub>2</sub> = 150 μmol·g <sup>-1</sup> ·h <sup>-1</sup> , O <sub>2</sub> = 38 μmol·g <sup>-1</sup> ·h <sup>-1</sup> . AQE = 6.3 % at 420 nm | 22        | 2010 |
| ZrO <sub>2</sub> /TaON (1.0 wt % Pt)                                                | TaON (0.5 wt % RuO <sub>2</sub> ) | H <sub>2</sub> evolution: 50 mg photocatalyst in 100 mL aqueous NaI solution (1.0 mM); O <sub>2</sub> evolution: 50 mg photocatalyst in 100 mL aqueous NaIO <sub>3</sub> solution (1.0 mM)                                                           | H <sub>2</sub> evolution: Pt/ZrO <sub>2</sub> /TaON - 58 μmol·g <sup>-1</sup> ·h <sup>-1</sup> ; O <sub>2</sub> evolution: RuO <sub>2</sub> /TaON - 260 μmol·g <sup>-1</sup> ·h <sup>-1</sup>                       | 50 mg each of Pt/ZrO <sub>2</sub> /TaON (HEP) and RuO <sub>2</sub> /TaON (OEP) in 100 mL aqueous NaI solution (0.2 mM), Pyrex top-irradiation vessel, Xe lamp (300 W) + cold mirror (CM-1), cutoff filter (L42), λ = 420-800 nm                                                                   | 146.7 μmol·g <sup>-1</sup> ·h <sup>-1</sup> H <sub>2</sub> ; 73.3 μmol·g <sup>-1</sup> ·h <sup>-1</sup> O <sub>2</sub>                                                                             | 187       | 2011 |
| Pt-TaON (0.3 wt % Pt)                                                               | PtO-WO <sub>3</sub> (0.5 wt % Pt) | H <sub>2</sub> evolution half-reaction: 0.2 g Pt-TaON in aqueous NaI solution (10 mM, pH 5.3; O <sub>2</sub> evolution half-                                                                                                                         | ~81.67 μmol·g <sup>-1</sup> ·h <sup>-1</sup> H <sub>2</sub> evolution at pH 5.3                                                                                                                                     | 0.2 g Pt-TaON + 0.3 g PtO-WO <sub>3</sub> in aqueous NaI solution (5 mM)                                                                                                                                                                                                                          | AQE = 0.5 % at 420 nm                                                                                                                                                                              | 93        | 2011 |

|                                                                                                         |                                                                        |                                                                                                                                                                                                                                                                       |                                                                                                                                                                                                                                                                    |                                                                                                                                                                                                         |                                                                                                                                                   |     |      |
|---------------------------------------------------------------------------------------------------------|------------------------------------------------------------------------|-----------------------------------------------------------------------------------------------------------------------------------------------------------------------------------------------------------------------------------------------------------------------|--------------------------------------------------------------------------------------------------------------------------------------------------------------------------------------------------------------------------------------------------------------------|---------------------------------------------------------------------------------------------------------------------------------------------------------------------------------------------------------|---------------------------------------------------------------------------------------------------------------------------------------------------|-----|------|
|                                                                                                         |                                                                        | reaction: 0.3 g PtO-WO <sub>3</sub> in aqueous solution (NaIO <sub>3</sub> 2 mM + NaI 5 mM                                                                                                                                                                            |                                                                                                                                                                                                                                                                    |                                                                                                                                                                                                         |                                                                                                                                                   |     |      |
| CdS@TaON (1 wt% CdS)                                                                                    | -                                                                      | HEP = 0.2 g dispersed in 200 mL aqueous solution containing Na <sub>2</sub> S (5 mL, 0.1 M) and Na <sub>2</sub> SO <sub>3</sub> (5 mL, 0.04 M)                                                                                                                        | CdS@TaON (1 wt% CdS) + 0.4 wt% Pt: 1530 μmol·g <sup>-1</sup> ·h <sup>-1</sup> H <sub>2</sub> , AQE = 15% at 420 nm                                                                                                                                                 | -                                                                                                                                                                                                       | -                                                                                                                                                 | 198 | 2012 |
| mac-TaON                                                                                                | -                                                                      | 10 vol.% methanol solution for H <sub>2</sub> evolution; HEP 40 mg                                                                                                                                                                                                    | H <sub>2</sub> evolution rate: 212.5 μmol·g <sup>-1</sup> ·h <sup>-1</sup>                                                                                                                                                                                         | -                                                                                                                                                                                                       | -                                                                                                                                                 | 126 | 2012 |
| ZrO <sub>2</sub> /TaON (0.5 wt% Pt)                                                                     | Pt/WO <sub>3</sub> (0.5 wt %)                                          | 10 vol.% methanol solution for H <sub>2</sub> evolution; HEP 100 mg                                                                                                                                                                                                   | H <sub>2</sub> evolution rate: 445 μmol·g <sup>-1</sup> ·h <sup>-1</sup> ; AQE: 1.7% at 420 nm                                                                                                                                                                     | -                                                                                                                                                                                                       | -                                                                                                                                                 | 125 | 2012 |
| TaON - (II) (Zn-TPPD) (0.1 wt% PtO <sub>2</sub> )                                                       | TaON                                                                   | H <sub>2</sub> formation: 0.24 M Na <sub>2</sub> S aqueous solution (sacrificial electron donor) and O <sub>2</sub> formation: 0.05 M AgNO <sub>3</sub> aqueous solution; 100 mg of HEP and 100 mg OEP                                                                | H <sub>2</sub> formation: 95.6 μmol·g <sup>-1</sup> ·h <sup>-1</sup>                                                                                                                                                                                               | -                                                                                                                                                                                                       | -                                                                                                                                                 | 186 | 2012 |
| IrO <sub>2</sub> /Cr <sub>2</sub> O <sub>3</sub> /RuO <sub>2</sub> /ZrO <sub>2</sub> /TaON (3.0 wt% Ru) | -                                                                      | -                                                                                                                                                                                                                                                                     | -                                                                                                                                                                                                                                                                  | Catalyst: 200 mg IrO <sub>2</sub> /Cr <sub>2</sub> O <sub>3</sub> /RuO <sub>2</sub> /ZrO <sub>2</sub> /TaON<br>Reactant solution: 400 mL pure water<br>Light source: High-pressure mercury lamp (450 W) | AQE ~0.1 % at 420 nm                                                                                                                              | 188 | 2013 |
| -                                                                                                       | TaON                                                                   | 0.1 g β-TaON + 0.2 g La <sub>2</sub> O <sub>3</sub> dispersed in 250 mL aqueous AgNO <sub>3</sub> solution (0.01 M), pH maintained at 8                                                                                                                               | O <sub>2</sub> evolution: 220 μmol·g <sup>-1</sup> ·h <sup>-1</sup>                                                                                                                                                                                                | -                                                                                                                                                                                                       | -                                                                                                                                                 | 103 | 2013 |
| γ-TaON (0.1 wt% Ru)                                                                                     | -                                                                      | 10 vol.% methanol solution for H <sub>2</sub> evolution, pH=7, 300 mg of HEP                                                                                                                                                                                          | H <sub>2</sub> evolution rate: 1272 μmol·g <sup>-1</sup> ·h <sup>-1</sup> ; AQE λ > 420 nm: 9.5 %                                                                                                                                                                  | -                                                                                                                                                                                                       | -                                                                                                                                                 | 20  | 2013 |
| TaON (3 wt% Pt)                                                                                         | TaON                                                                   | 10 vol.% methanol solution for H <sub>2</sub> evolution, O <sub>2</sub> evolution: 0.20 g La <sub>2</sub> O <sub>3</sub> in 0.01 M AgNO <sub>3</sub> aqueous solution; 200 mg of HEP and 200 mg of OEP                                                                | H <sub>2</sub> : up to 64.5 μmol·g <sup>-1</sup> ·h <sup>-1</sup> ; O <sub>2</sub> : up to 308 μmol·g <sup>-1</sup> ·h <sup>-1</sup>                                                                                                                               | -                                                                                                                                                                                                       | -                                                                                                                                                 | 105 | 2014 |
| γ-TaON (1 wt% MoS <sub>2</sub> -CdS)                                                                    | -                                                                      | Mixed aqueous solution containing 0.35 M Na <sub>2</sub> S + 0.25 M Na <sub>2</sub> SO <sub>3</sub> . HEP: 200 mg                                                                                                                                                     | H <sub>2</sub> : 1728 μmol·g <sup>-1</sup> ·h <sup>-1</sup>                                                                                                                                                                                                        | -                                                                                                                                                                                                       | -                                                                                                                                                 | 113 | 2014 |
| CQDs/H-γ-TaON                                                                                           | -                                                                      | 10 vol.% methanol solution for H <sub>2</sub> evolution, 300 mg of HEP                                                                                                                                                                                                | H <sub>2</sub> : 1655 μmol·g <sup>-1</sup> ·h <sup>-1</sup> ; (AQE): 12.2 % at 420 nm                                                                                                                                                                              | -                                                                                                                                                                                                       | -                                                                                                                                                 | 21  | 2015 |
| MgTa <sub>2</sub> O <sub>6</sub> N <sub>x</sub> /TaON (0.4 wt% Pt)                                      | WO <sub>3</sub> (0.45 wt% PtO <sub>2</sub> )                           | -                                                                                                                                                                                                                                                                     | -                                                                                                                                                                                                                                                                  | HEP: 75 mg; OEP:150 mg; 150 mL aqueous NaI solution (1.0 mM)                                                                                                                                            | H <sub>2</sub> : 1444 μmol·g <sup>-1</sup> ·h <sup>-1</sup> ; O <sub>2</sub> : 368.6 μmol·g <sup>-1</sup> ·h <sup>-1</sup> ; AQE = 6.8% at 420 nm | 197 | 2015 |
| TaON/Bi <sub>2</sub> O <sub>3</sub>                                                                     | -                                                                      | 20 vol.% methanol solution for H <sub>2</sub> evolution; 50 mg of HEP                                                                                                                                                                                                 | 1360 μmol·g <sup>-1</sup> ·h <sup>-1</sup> H <sub>2</sub>                                                                                                                                                                                                          | -                                                                                                                                                                                                       | -                                                                                                                                                 | 177 | 2015 |
| TaON + Ni(OH) <sub>2</sub>                                                                              | -                                                                      | 10 vol.% methanol solution for H <sub>2</sub> evolution; 100 mg of HEP                                                                                                                                                                                                | H <sub>2</sub> evolution 31.5 μmol·g <sup>-1</sup> ·h <sup>-1</sup>                                                                                                                                                                                                | -                                                                                                                                                                                                       | -                                                                                                                                                 | 171 | 2015 |
| γ-TaON (0.1 wt% Pt)                                                                                     | -                                                                      | 10 vol.% methanol solution for H <sub>2</sub> evolution; 300 mg of HEP                                                                                                                                                                                                | 1097 μmol·g <sup>-1</sup> ·h <sup>-1</sup> H <sub>2</sub> ; AQE: 7.5% at 420 nm                                                                                                                                                                                    | -                                                                                                                                                                                                       | -                                                                                                                                                 | 51  | 2015 |
| Mg <sub>0.05</sub> Ta <sub>0.95</sub> O <sub>1.15</sub> N <sub>0.85</sub> (0.1 wt% Pt or 0.1 wt% Ru)    | -                                                                      | 25 vol.% methanol solution for H <sub>2</sub> evolution; 150 mg of HEP                                                                                                                                                                                                | Pt: 23.3 μmol·g <sup>-1</sup> ·h <sup>-1</sup> H <sub>2</sub><br>Ru: 846.6 μmol·g <sup>-1</sup> ·h <sup>-1</sup> H <sub>2</sub>                                                                                                                                    | -                                                                                                                                                                                                       | -                                                                                                                                                 | 54  | 2016 |
| -                                                                                                       | TaON/Ta <sub>3</sub> N <sub>5</sub>                                    | 10 mM AgNO <sub>3</sub> aqueous solution, 200 mg La <sub>2</sub> O <sub>3</sub> , 100 mg of OEP                                                                                                                                                                       | O <sub>2</sub> evolution rates: 20.1 μmol·g <sup>-1</sup> ·h <sup>-1</sup> (Ca <sup>2+</sup> /urea = 0.10), 33.2 μmol·g <sup>-1</sup> ·h <sup>-1</sup> (Ca <sup>2+</sup> /urea = 0.50), 46.6 μmol·g <sup>-1</sup> ·h <sup>-1</sup> (Ca <sup>2+</sup> /urea = 0.25) | -                                                                                                                                                                                                       | -                                                                                                                                                 | 135 | 2016 |
| Ta <sub>3</sub> N <sub>5</sub> @NaTaON (1 wt% Pt)                                                       | Ta <sub>3</sub> N <sub>5</sub> @NaTaON                                 | O <sub>2</sub> evolution: 50 mg photocatalyst suspended in 200 mL aqueous solution containing sodium persulfate (Na <sub>2</sub> S <sub>2</sub> O <sub>8</sub> ); H <sub>2</sub> evolution: 50 mg photocatalyst with 1 wt% Pt, suspended in aqueous methanol solution | 10920 μmol·g <sup>-1</sup> ·h <sup>-1</sup> O <sub>2</sub> at NaOH 0.1 M                                                                                                                                                                                           | -                                                                                                                                                                                                       | -                                                                                                                                                 | 176 | 2017 |
| -                                                                                                       | TaON + Ru(OH) <sub>2</sub> Cl <sub>y</sub> (1.0 wt% Ru and 0.1 wt% Co) | 1 mM NaIO <sub>3</sub> of aqueous solution for O <sub>2</sub> evolution; 50 mg of OEP                                                                                                                                                                                 | 250 μmol·g <sup>-1</sup> ·h <sup>-1</sup> O <sub>2</sub> evolution                                                                                                                                                                                                 | -                                                                                                                                                                                                       | -                                                                                                                                                 | 101 | 2017 |
| ZrO <sub>2</sub> /TaON (0.7 wt%)                                                                        | Ta <sub>3</sub> N <sub>5</sub> (1 wt% Ir)                              | -                                                                                                                                                                                                                                                                     | -                                                                                                                                                                                                                                                                  | Aqueous solution containing NaI (0-4                                                                                                                                                                    | H <sub>2</sub> = 41.6                                                                                                                             | 203 |      |

|                                                                                               |                                                                                                              |                                                                                                                                                                                                      |                                                                                                                                                                                   |                                                                                                                     |                                                                                                                                                                                     |     |      |
|-----------------------------------------------------------------------------------------------|--------------------------------------------------------------------------------------------------------------|------------------------------------------------------------------------------------------------------------------------------------------------------------------------------------------------------|-----------------------------------------------------------------------------------------------------------------------------------------------------------------------------------|---------------------------------------------------------------------------------------------------------------------|-------------------------------------------------------------------------------------------------------------------------------------------------------------------------------------|-----|------|
| Pt                                                                                            |                                                                                                              |                                                                                                                                                                                                      |                                                                                                                                                                                   | mM) and NaIO <sub>3</sub> (0–2 mM); 120 mg HEP and 40 mg OEP                                                        | $\mu\text{mol}\cdot\text{g}^{-1}\cdot\text{h}^{-1}$ ; O <sub>2</sub> = 62.5 $\mu\text{mol}\cdot\text{g}^{-1}\cdot\text{h}^{-1}$                                                     |     | 2018 |
| -                                                                                             | TaON                                                                                                         | 50 mL aqueous solution of 40 mg OEP, 85 mg AgNO <sub>3</sub> , 30 mg La <sub>2</sub> O <sub>3</sub> , pH = 7.5, 150 W Xe lamp, $\lambda > 400$ nm.                                                   | 67.5 $\mu\text{mol}\cdot\text{g}^{-1}\cdot\text{h}^{-1}$ O <sub>2</sub>                                                                                                           | -                                                                                                                   | -                                                                                                                                                                                   | 24  | 2019 |
| ZnS/CdS/ $\gamma$ -TaON                                                                       | -                                                                                                            | 100 mg photocatalyst dispersed in 100 mL aqueous solution containing 0.35 M Na <sub>2</sub> S and 0.25 M Na <sub>2</sub> SO <sub>3</sub>                                                             | 839.6 $\mu\text{mol}\cdot\text{g}^{-1}\cdot\text{h}^{-1}$ H <sub>2</sub>                                                                                                          | -                                                                                                                   | -                                                                                                                                                                                   | 114 | 2019 |
| Pt/ZrO <sub>2</sub> /TaON (0.5 wt% Pt)                                                        | TaON (0.05 wt% Ru)                                                                                           | O <sub>2</sub> evolution: NaIO <sub>3</sub> (1 mM), 50 mg of OEP                                                                                                                                     | O <sub>2</sub> evolution rate: 860 $\mu\text{mol}\cdot\text{g}^{-1}\cdot\text{h}^{-1}$ , (AQE) at 420 nm: 6.9%                                                                    | Z-scheme two-step water splitting. Aqueous solution containing NaI (0.5 mM); 50 mg of HEP and 50 mg of OEP          | 208 $\mu\text{mol}\cdot\text{g}^{-1}\cdot\text{h}^{-1}$ H <sub>2</sub> ; 104 $\mu\text{mol}\cdot\text{g}^{-1}\cdot\text{h}^{-1}$ O <sub>2</sub>                                     | 94  | 2019 |
| $\gamma$ -TaON (1 wt% Pt)                                                                     | -                                                                                                            | Aqueous triethanolamine (TEOA) solution, 300 W Xe lamp                                                                                                                                               | 1393.6 $\mu\text{mol}\cdot\text{g}^{-1}\cdot\text{h}^{-1}$ H <sub>2</sub>                                                                                                         | -                                                                                                                   | -                                                                                                                                                                                   | 136 | 2019 |
| TaON@Ta <sub>2</sub> O <sub>5</sub> (Rh)                                                      | -                                                                                                            | 20 vol.% methanol solution for H <sub>2</sub> evolution; 200 mg of HEP                                                                                                                               | 39.41 $\mu\text{mol}\cdot\text{g}^{-1}\cdot\text{h}^{-1}$ H <sub>2</sub> evolution                                                                                                | -                                                                                                                   | -                                                                                                                                                                                   | 178 | 2020 |
| TaON/Cd <sub>0.3</sub> Zn <sub>0.3</sub> S (0.5 wt% NiS)                                      | -                                                                                                            | Mixed solution containing 0.35 M Na <sub>2</sub> S + 0.25 M Na <sub>2</sub> SO <sub>3</sub> ; 50 mg of HEP                                                                                           | H <sub>2</sub> evolution rate: 34800 $\mu\text{mol}\cdot\text{g}^{-1}\cdot\text{h}^{-1}$ ; AQE 25.5% at 420 nm                                                                    | -                                                                                                                   | -                                                                                                                                                                                   | 88  | 2020 |
| Ta <sub>2</sub> O <sub>5</sub> @TaON@Ta <sub>3</sub> N <sub>5</sub> (Rh)                      | -                                                                                                            | 20 vol.% methanol; 300 W Xe lamp with $\lambda > 420$ nm cutoff filter                                                                                                                               | 83.64 $\mu\text{mol}\cdot\text{g}^{-1}\cdot\text{h}^{-1}$                                                                                                                         | -                                                                                                                   | -                                                                                                                                                                                   | 116 | 2020 |
| TaON                                                                                          | -                                                                                                            | 50 mg HEP dispersed in 60 mL water + 5 mL triethanolamine (TEOA)                                                                                                                                     | 25 $\mu\text{mol}\cdot\text{g}^{-1}\cdot\text{h}^{-1}$ H <sub>2</sub>                                                                                                             | -                                                                                                                   | -                                                                                                                                                                                   | 130 | 2021 |
| -                                                                                             | TaON (0.15 wt% CoO <sub>x</sub> )                                                                            | 25 mg catalyst; 50 mg La <sub>2</sub> O <sub>3</sub> (pH buffer, maintains pH 8.5); 150 mg AgNO <sub>3</sub>                                                                                         | 6100 $\mu\text{mol}\cdot\text{g}^{-1}\cdot\text{h}^{-1}$ ; (AQE) = 21.2 % at 420 nm                                                                                               | -                                                                                                                   | -                                                                                                                                                                                   | 185 | 2021 |
| TaON/CdS (2 wt% Pt)                                                                           | -                                                                                                            | 10 mg of HEP; aqueous solution containing 10 mL lactic acid (10% v/v)                                                                                                                                | 19290 $\mu\text{mol}\cdot\text{g}^{-1}\cdot\text{h}^{-1}$ H <sub>2</sub> ; AQE at 420 nm = 18.23%                                                                                 | -                                                                                                                   | -                                                                                                                                                                                   | 191 | 2022 |
| Zr-TaON/Ta <sub>3</sub> N <sub>5</sub> (Ru 4 wt%) / Cr <sub>2</sub> O <sub>3</sub> 4 wt%      | Zr-TaON/Ta <sub>3</sub> N <sub>5</sub> (0.6 wt% IrO <sub>2</sub> )                                           | -                                                                                                                                                                                                    | -                                                                                                                                                                                 | pH 8.0, adjusted with NaOH(aq.); 150 mg of HEP and OEP, under visible light irradiation $\lambda > 380$ nm          | AQE = 0.66% at 420 nm; STH = 0.009%                                                                                                                                                 | 124 | 2022 |
| -                                                                                             | TaON                                                                                                         | 200 mL distilled water + 100 mg La <sub>2</sub> O <sub>3</sub> (pH=8); AgNO <sub>3</sub> , 1.2 mmol; OEP: 100 mg                                                                                     | 2500 $\mu\text{mol}\cdot\text{g}^{-1}\cdot\text{h}^{-1}$ O <sub>2</sub> evolution                                                                                                 | -                                                                                                                   | -                                                                                                                                                                                   | 104 | 2022 |
| SiO <sub>2</sub> @TaON@ Ta <sub>3</sub> N <sub>5</sub> (Pd/PdO)                               | SiO <sub>2</sub> @TaON@Ta <sub>3</sub> N <sub>5</sub> (RuO <sub>2</sub> )                                    | -                                                                                                                                                                                                    | -                                                                                                                                                                                 | 30 mg of HEP and OEP, 100 mL deionized water w/ no sacrificial agent, 300 W Xe lamp with 420 nm cut-off filter      | H <sub>2</sub> : 473.52 $\mu\text{mol}\cdot\text{g}^{-1}\cdot\text{h}^{-1}$<br>O <sub>2</sub> : 83.88 $\mu\text{mol}\cdot\text{g}^{-1}\cdot\text{h}^{-1}$<br>AQE = 0.253% at 420 nm | 115 | 2023 |
| ZrO <sub>2</sub> /MgTa <sub>2</sub> O <sub>6-x</sub> N <sub>x</sub> Zr/Ta = 0.10 (0.2 wt% Pt) | ZrO <sub>2</sub> /MgTa <sub>2</sub> O <sub>6-x</sub> N <sub>x</sub> Zr/Ta = 0.05 (1.0 wt% CoO <sub>x</sub> ) | 100 mg of HEP in aqueous ascorbic acid solution (10 mmol·L <sup>-1</sup> ); 100 mg of OEP in AgNO <sub>3</sub> solution (50 mmol·L <sup>-1</sup> ), pH = 8.5 + 100 mg La <sub>2</sub> O <sub>3</sub> | H <sub>2</sub> evolution rate: 2980 $\mu\text{mol}\cdot\text{g}^{-1}\cdot\text{h}^{-1}$ ; O <sub>2</sub> evolution rate: 1880 $\mu\text{mol}\cdot\text{g}^{-1}\cdot\text{h}^{-1}$ | -                                                                                                                   | -                                                                                                                                                                                   | 123 | 2023 |
| TaON/CdS                                                                                      | -                                                                                                            | 40 mg of HEP, 0.35 M Na <sub>2</sub> S + 0.25 M Na <sub>2</sub> SO <sub>3</sub> in 40 mL distilled water                                                                                             | 277000 $\mu\text{mol}\cdot\text{g}^{-1}\cdot\text{h}^{-1}$ H <sub>2</sub> evolution rate; (AQE) at 400 nm = 12.2%                                                                 | -                                                                                                                   | -                                                                                                                                                                                   | 172 | 2023 |
| CdZnS (12 wt% TaON)                                                                           | -                                                                                                            | 10 mg of HEP; aqueous solution containing 10 mL lactic acid, TaON acted as co-catalyst                                                                                                               | 7430 $\mu\text{mol}\cdot\text{g}^{-1}\cdot\text{h}^{-1}$ H <sub>2</sub> ; AQE at 420 nm = 20.12%                                                                                  | -                                                                                                                   | -                                                                                                                                                                                   | 173 | 2024 |
| TaON (2 wt% Pt)                                                                               | -                                                                                                            | 10 mg of HEP; 2 mL methanol (10 vol%)                                                                                                                                                                | 275 $\mu\text{mol}\cdot\text{g}^{-1}\cdot\text{h}^{-1}$ H <sub>2</sub> at 343 nm cut-off irradiation                                                                              | -                                                                                                                   | -                                                                                                                                                                                   | 127 | 2024 |
| SrTiO <sub>3</sub> :Rh                                                                        | TaON (IrO <sub>2</sub> 0.75 wt%)                                                                             | Aqueous ascorbic acid (10 mM) and 30 mg of HEP; Aqueous AgNO <sub>3</sub> (10 mM); and 30 mg of HEP, and 30 mg of OEP                                                                                | 4166 $\mu\text{mol}\cdot\text{g}^{-1}\cdot\text{h}^{-1}$ O <sub>2</sub> ; 390 $\mu\text{mol}\cdot\text{g}^{-1}\cdot\text{h}^{-1}$ H <sub>2</sub>                                  | Z-scheme system 43 mg OEP + 37 mg HEP; 100 mL ultrapure water, pH adjusted to 3 with H <sub>2</sub> SO <sub>4</sub> | At pH = 3, H <sub>2</sub> = 21.6 $\mu\text{mol}\cdot\text{g}^{-1}\cdot\text{h}^{-1}$ , O <sub>2</sub> = 9.3 $\mu\text{mol}\cdot\text{g}^{-1}\cdot\text{h}^{-1}$                     | 139 | 2024 |

**Table S2. Photoelectrochemical performance of TaON**

| Photoanode ( <i>fabrication method</i> )                                                                 | Reaction conditions                                                                                                                            | Photocurrent density                                                      | IPCE/ABPE                            | H <sub>2</sub> and/or O <sub>2</sub> evolution                                                                                                                                                                                          | STH/HC-STH            | Reference | Year |
|----------------------------------------------------------------------------------------------------------|------------------------------------------------------------------------------------------------------------------------------------------------|---------------------------------------------------------------------------|--------------------------------------|-----------------------------------------------------------------------------------------------------------------------------------------------------------------------------------------------------------------------------------------|-----------------------|-----------|------|
| TaON ( <i>sono-electrochemical anodization</i> )                                                         | Reference electrode: Ag/AgCl, Electrolyte: 1 M KOH                                                                                             | 2.6 mA·cm <sup>-2</sup> at 1.52 V vs RHE, under AM 1.5 illumination       | -                                    | -                                                                                                                                                                                                                                       | -                     | 25        | 2009 |
| TaON-IrO <sub>2</sub> ( <i>electrophoretic deposition</i> )                                              | Reference electrode: Ag/AgCl, Electrolyte: 0.1 M Na <sub>2</sub> SO <sub>4</sub> (pH = 6)                                                      | -                                                                         | ~76% at 400 nm at 1.15 V vs. RHE     | At 1.0 V applied bias, 25.7 μmol·h <sup>-1</sup> H <sub>2</sub> (Pt wire) and 12 μmol·h <sup>-1</sup> O <sub>2</sub>                                                                                                                    | -                     | 47        | 2010 |
| TaON - IrO <sub>2</sub> ( <i>electrophoretic deposition and post-necking method</i> )                    | Reference electrode: Ag/AgCl, Electrolyte: 0.1 M Na <sub>2</sub> SO <sub>4</sub> (pH = 6)                                                      | 1.2 mA·cm <sup>-2</sup> at 0.6 V vs. Ag/AgCl                              | 76% IPCE at 400 nm at 1.15 V vs. RHE | At 1.0 V applied bias, 21.7 μmol·h <sup>-1</sup> H <sub>2</sub> (Pt wire) and 10.7 μmol·h <sup>-1</sup> O <sub>2</sub>                                                                                                                  | -                     | 27        | 2011 |
| β-TaON-Ta <sub>3</sub> N <sub>5</sub> -N:Ta <sub>2</sub> O <sub>5</sub> ( <i>DC sputtering</i> )         | Reference electrode: Ag/AgCl, Electrolyte: 0.1 M Na <sub>2</sub> SO <sub>4</sub> (pH = 6)                                                      | 0.25 mA·cm <sup>-2</sup> at 1.23 V vs. RHE under AM 1.5 illumination      | -                                    | -                                                                                                                                                                                                                                       | -                     | 119       | 2012 |
| TaON ( <i>DC reactive sputtering</i> )                                                                   | Reference electrode: Ag/AgCl; Electrolyte: 0.1 M Na <sub>2</sub> SO <sub>4</sub> (pH = 7), 450 W xenon lamp with KG3 filter, simulating AM 1.5 | 30 μA·cm <sup>-2</sup> at 1.23 V vs. RHE                                  | -                                    | -                                                                                                                                                                                                                                       | -                     | 23        | 2012 |
| CoO <sub>x</sub> /TaON ( <i>electrophoretic deposition and post-necking method</i> )                     | Reference electrode: Ag/AgCl; Electrolyte: 0.1 M Na <sub>2</sub> SO <sub>4</sub> (pH = 6 or 8) and 0.1 M sodium phosphate buffer (pH = 8)      | -                                                                         | 42% at 400 nm, at 1.23 V vs. RHE     | At 1.07 V applied bias, 134 μmol·h <sup>-1</sup> H <sub>2</sub> (Pt), 67 μmol·h <sup>-1</sup> O <sub>2</sub>                                                                                                                            | -                     | 169       | 2012 |
| CaFe <sub>2</sub> O <sub>4</sub> /TaON ( <i>electrophoretic deposition</i> )                             | Reference electrode: Ag/AgCl, Electrolyte: 0.5 M NaOH (pH = 13.7)                                                                              | 1.26 mA·cm <sup>-2</sup> at 1.23 V vs. RHE                                | 30% at 400 nm at 1.23 V vs. RHE      | At 1.23 V applied bias, 41.13 μmol·h <sup>-1</sup> H <sub>2</sub> (Pt mesh), 19.57 μmol·h <sup>-1</sup> O <sub>2</sub> ; with Faradaic efficiencies of 80%                                                                              | 0.053% at 1 V vs. RHE | 192       | 2013 |
| γ-TaON ( <i>dip-coating</i> )                                                                            | Reference electrode: SCE, Electrolyte: 0.5 M Na <sub>2</sub> SO <sub>4</sub>                                                                   | 1.4 mA·cm <sup>-2</sup> at 1.45 V vs. RHE                                 | -                                    | -                                                                                                                                                                                                                                       | -                     | 20        | 2013 |
| Cu <sub>2</sub> O/TaON ( <i>vapor-phase hydrothermal treatment</i> )                                     | Reference electrode: SCE, Electrolyte: 0.5 M NaOH (pH = 13.6)                                                                                  | 4.36 mA·cm <sup>-2</sup> at 1.23 V vs. RHE, under AM 1.5G illumination    | 59% at 400 nm at 1.0 V vs. RHE       | At 1.0 V applied bias, H <sub>2</sub> = 46.5 μmol·h <sup>-1</sup> ·cm <sup>-2</sup> (Pt foil), O <sub>2</sub> = 23.1 μmol·h <sup>-1</sup> ·cm <sup>-2</sup> , with Faradaic efficiencies of H <sub>2</sub> = 93%, O <sub>2</sub> = 90%  | -                     | 112       | 2014 |
| TaON ( <i>anodization</i> )                                                                              | Reference electrode: Ag/AgCl, Electrolyte: 1.0 M KOH                                                                                           | 3.15 mA·cm <sup>-2</sup> at 1.62 V vs. RHE ( <i>multi-layered</i> )       | ~7.5% at 400-450 nm at 1.62 vs. RHE  | -                                                                                                                                                                                                                                       | -                     | 26        | 2014 |
| TiO <sub>2</sub> -TaON ( <i>two-step electrochemical anodization</i> )                                   | Reference electrode: Ag/AgCl, Electrolyte: 0.1 M KOH (pH = 13)                                                                                 | 2.45 mA·cm <sup>-2</sup> at 1.86 V vs. RHE                                | 25% at 380 nm at 1.86 V vs. RHE      | At 0.9 V applied bias H <sub>2</sub> = 25 μmol·h <sup>-1</sup> (Pt wire), O <sub>2</sub> = 9 μmol·h <sup>-1</sup> , with Faradaic efficiency of 98% for H <sub>2</sub> evolution                                                        | -                     | 118       | 2015 |
| Ba-TaON - C <sub>3</sub> N <sub>4</sub> - CoO <sub>x</sub> ( <i>vapor-phase hydrothermal treatment</i> ) | Reference electrode: Ag/AgCl, Electrolyte: 1.0 M NaOH (pH = 13.6)                                                                              | 4.57 mA·cm <sup>-2</sup> at 1.23 V vs. RHE under AM 1.5G illumination     | 62% at 400 nm at 1.23 V vs. RHE      | At 1.0 V applied bias, H <sub>2</sub> = 52 μmol·h <sup>-1</sup> ·cm <sup>-2</sup> (Pt mesh), O <sub>2</sub> = 25.9 μmol·h <sup>-1</sup> ·cm <sup>-2</sup> , with Faradaic efficiencies: 96% (H <sub>2</sub> ) and 93% (O <sub>2</sub> ) | -                     | 28        | 2015 |
| CoO <sub>x</sub> /TaON ( <i>electrophoretic deposition</i> )                                             | Reference electrode: Ag/AgCl, Electrolyte: 50 mM NaHCO <sub>3</sub> (pH = 8.3)                                                                 | -                                                                         | -                                    | O <sub>2</sub> = 0.84 μmol·h <sup>-1</sup> with a Faradaic efficiency of 89%                                                                                                                                                            | -                     | 170       | 2016 |
| TiO <sub>2</sub> -TaON-MnO <sub>x</sub> ( <i>photo-assisted electrodeposition</i> )                      | Reference electrode: Ag/AgCl, Electrolyte: 0.1 M Na <sub>2</sub> SO <sub>4</sub> (pH = 6)                                                      | 250 μA·cm <sup>-2</sup> at 0.95 V vs. RHE                                 | 8% at 1.0 V vs. RHE at 410 nm        | -                                                                                                                                                                                                                                       | -                     | 194       | 2016 |
| CoO <sub>x</sub> /TiO <sub>2</sub> -TaON ( <i>post-necking</i> )                                         | Reference electrode: Ag/AgCl; 0.1 M sodium borate buffer (pH = 9.2)                                                                            | 0.70 mA·cm <sup>-2</sup> at 1.23 V vs. RHE under λ > 400 nm               | 50% at 1.5 V vs. RHE, > 410 nm       | H <sub>2</sub> = 40 μmol·h <sup>-1</sup> (Pt wire) and O <sub>2</sub> = 20 μmol·h <sup>-1</sup> with 100% Faradaic efficiency                                                                                                           | -                     | 195       | 2016 |
| NiO <sub>x</sub> /TiO <sub>2</sub> -TaON ( <i>photo-electrodeposition</i> )                              | Reference electrode: Ag/AgCl; 0.10 M sodium borate buffer, pH = 9.2. Light source: 150 W Xe-arc lamp with AM 1.5G                              | 0.75 mA·cm <sup>-2</sup> at 0.9 V vs. RHE                                 | 7.5 % at 410 nm at 0.9 V vs. RHE     | -                                                                                                                                                                                                                                       | -                     | 199       | 2016 |
| CoO <sub>x</sub> /TaON ( <i>electrophoretic deposition</i> )                                             | Reference electrode: Ag/AgCl, Electrolyte: 50 mM NaHCO <sub>3</sub> (pH = 6.6)                                                                 | 9.39 μA·cm <sup>-2</sup> at 0.79 vs. RHE                                  | -                                    | O <sub>2</sub> = 0.133 μmol·h <sup>-1</sup> with 70% Faradaic efficiency                                                                                                                                                                | -                     | 193       | 2017 |
| TaON ( <i>reactive radiofrequency magnetron sputtering</i> )                                             | Reference electrode: SCE, Electrolyte: 0.5 M Na <sub>2</sub> SO <sub>4</sub>                                                                   | 1.2 μA·cm <sup>-2</sup> at 1.15 V vs RHE under visible light (λ > 450 nm) | -                                    | 0.0101 μmol·h <sup>-1</sup> H <sub>2</sub> (Pt rod) evolution                                                                                                                                                                           | -                     | 168       | 2017 |
| TaON ( <i>electrophoretic deposition and post-necking</i> )                                              | Reference electrode: RHE; 0.1 M potassium phosphate buffer, pH = 7.3; Co-catalyst: CoPi                                                        | 0.59 mA·cm <sup>-2</sup> at 1.23 V vs. RHE                                | -                                    | -                                                                                                                                                                                                                                       | -                     | 24        | 2019 |
| TaON ( <i>double-step anodic oxidation</i> )                                                             | Reference electrode: 3 M KCl-Ag/AgCl, 1 M Na <sub>2</sub> SO <sub>3</sub>                                                                      | 0.1 mA·cm <sup>-2</sup> at 1.09 V vs. RHE                                 | -                                    | 27.3 μmol·h <sup>-1</sup> ·cm <sup>-2</sup> H <sub>2</sub> (Pt wire)                                                                                                                                                                    | -                     | 117       | 2023 |
